# Supplementary material for: A low-cost optofluidic platform for the colorimetric assessment of bacterial activity in domestic wastewater
Source: Royal Society of Chemistry journal article supplement (doi:10.1039/d3ay01612a), 2023-01-01
Supplement: d3ay01612a1.pdf [file d3ay01612a1.pdf]

# Low-cost optofluidic platform for colorimetric assessment of bacterial activity in domestic wastewater

*Prajal Chettri,<sup>a\*</sup> Kalathur Mohan Ganesh,<sup>b</sup> Sahashransu Satyajeet Mahapatra,<sup>c</sup> A. S.*

*Vishwanathan<sup>c</sup> and Shailesh Srivastava<sup>a</sup>*

<sup>a</sup> FEMTO FabULLAS, CRIF, Department of Physics, Sri Sathya Sai Institute of Higher Learning, Prasanthi Nilayam, Andhra Pradesh 515134, India

<sup>b</sup> STAR Laboratory, CRIF, Department of Chemistry, Sri Sathya Sai Institute of Higher Learning, Prasanthi Nilayam, Andhra Pradesh 515134, India

<sup>c</sup> WATER Laboratory, Department of Biosciences, Sri Sathya Sai Institute of Higher Learning, Prasanthi Nilayam, Andhra Pradesh 515134, India

\* Corresponding authors: [prajalchettri@sssihl.edu.in](mailto:prajalchettri@sssihl.edu.in) (E-mail)

## Supplementary information

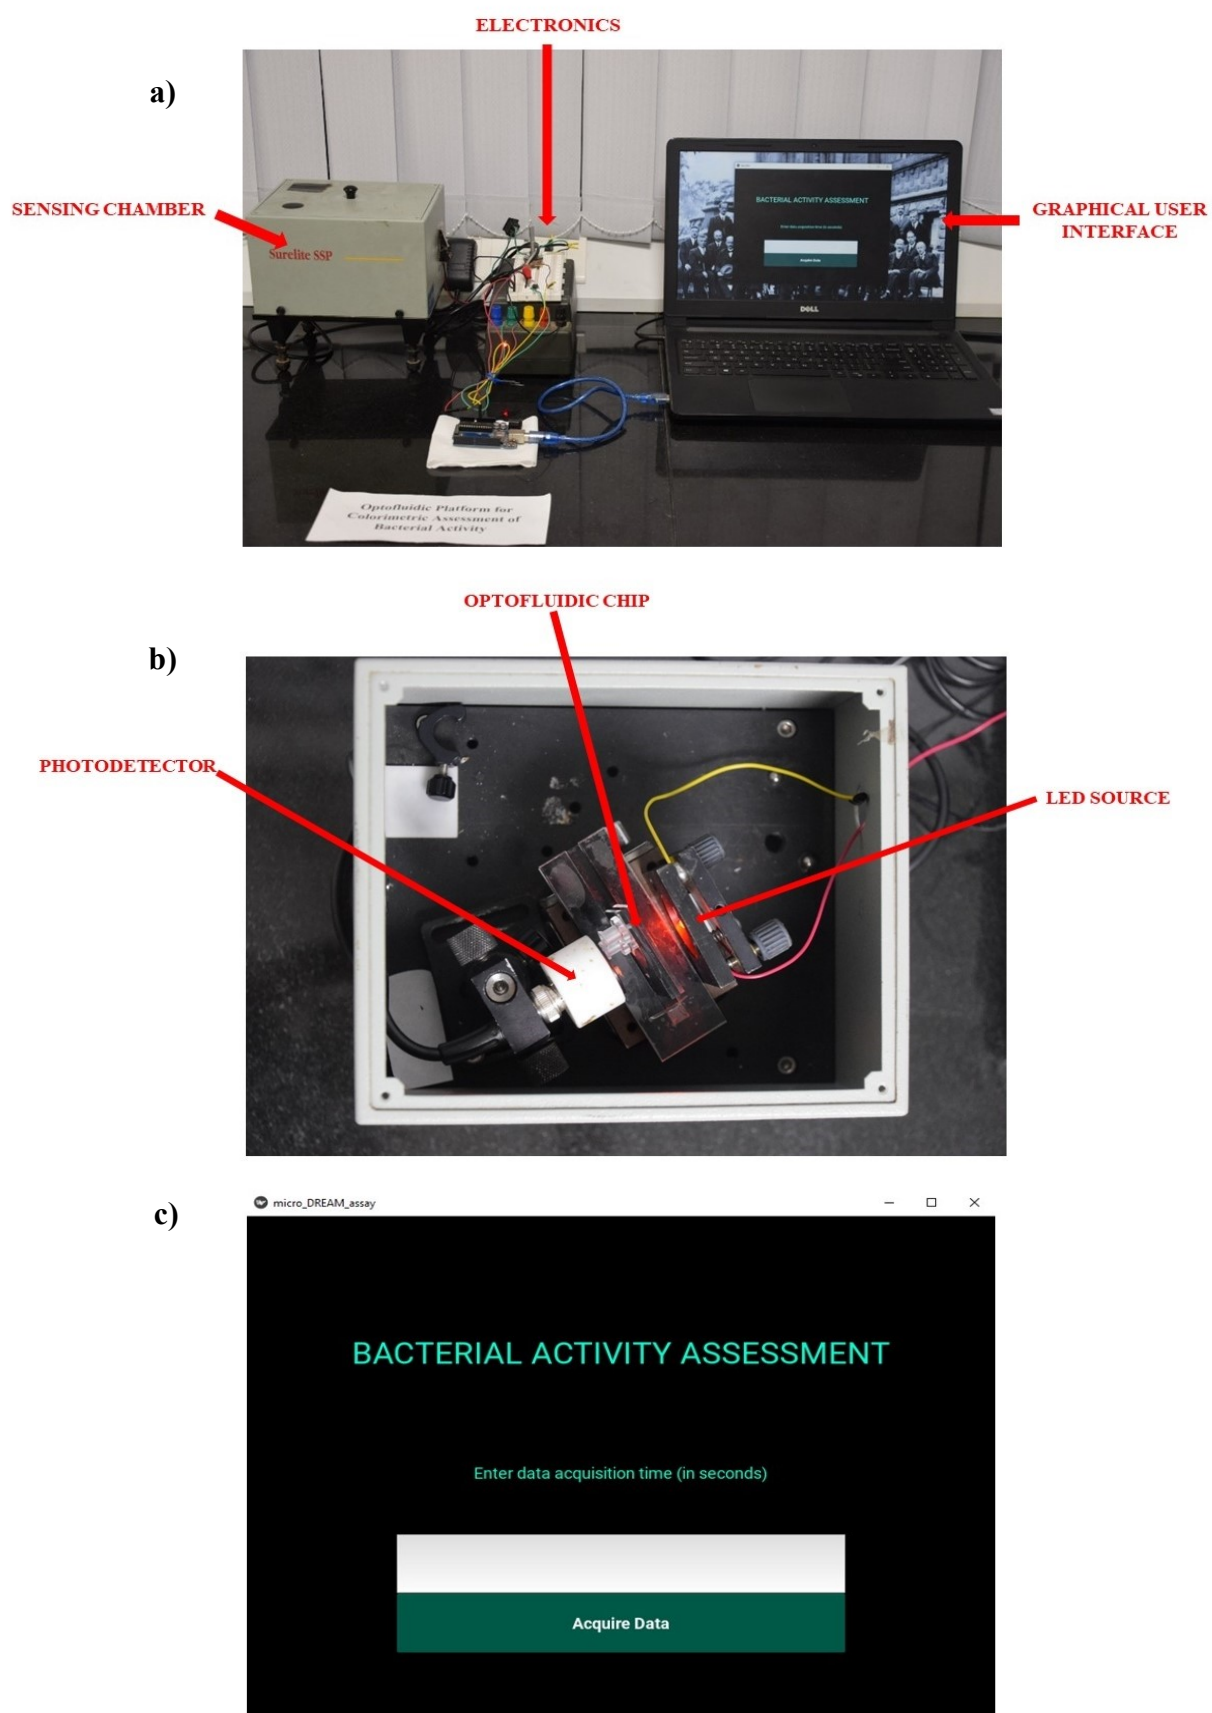

**Figure S1.** a) Experimental setup which includes the sensing chamber, electronics and a custom-built software. b) Image of the inside of sensing chamber. c) Custom-built GUI for real time monitoring using Arduino-Python interfacing.

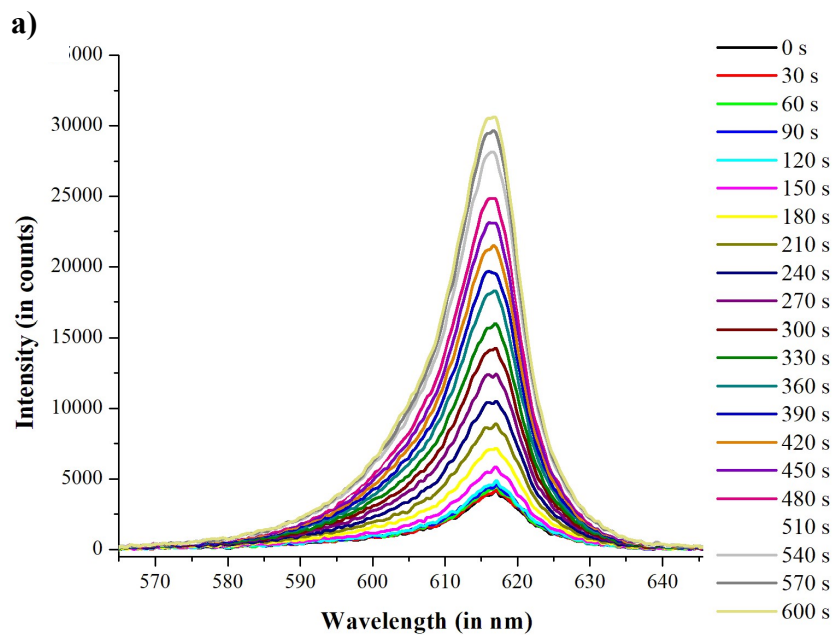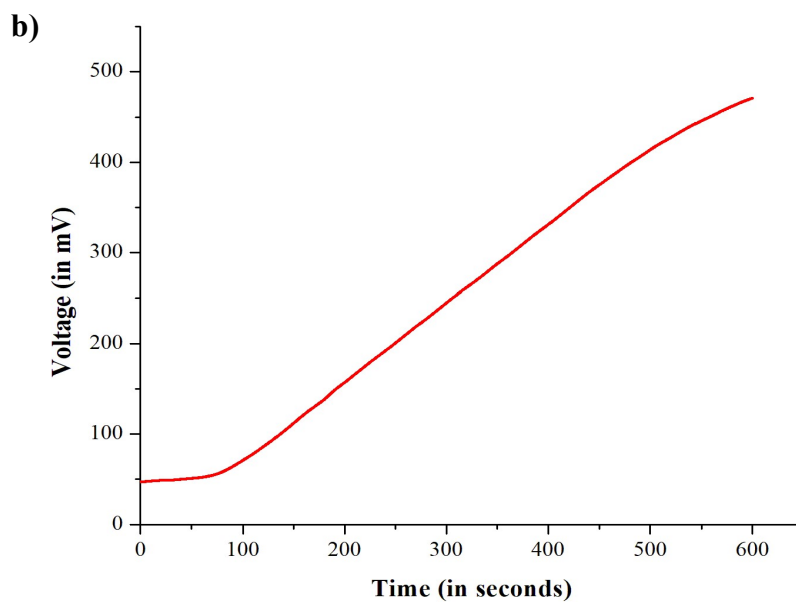

**Figure S2.** a) Decolorization as a function of increasing intensity as measured by Ocean Optics Spectrometer. (b) Decolorization as a function of increasing voltage as measured by PIN-10D photodiode
